# Supplementary material
Source: Research Square preprint supplement (doi:10.21203/rs.3.rs-9098008/v1)
Supplement: Supplementary file 1 [file 6c198facc1095985901dfddb.docx]

**Supplementary Information**

Condition-Specific Readmission Risk Stratification in a Predominantly Black Statewide Cohort Using Machine Learning: Development of Subtype-Specific Models for Heart Failure, Acute Myocardial Infarction, Atrial Fibrillation/Flutter, and Hypertensive Heart Disease

*Ismail El Moudden, Michael Bittner, Sunita Dodani*

**Supplementary Table S1.** Four-Method Consensus Feature Selection Results

| **Feature** | **Boruta** | **SHAP** | **RFE** | **mRMR** | **Votes** | **Selected** |
| --- | --- | --- | --- | --- | --- | --- |
| LACE: ED Visits | Y | Y | Y | Y | 4 | Y |
| Insurance Type | Y | Y | Y | Y | 4 | Y |
| Total Diagnoses | Y | Y | Y | Y | 4 | Y |
| LACE Index (0-19) | Y | Y | Y | Y | 4 | Y |
| Obesity | Y | Y | Y | Y | 4 | Y |
| Total CVD Conditions | Y | Y | Y | Y | 4 | Y |
| Admission Order | Y | Y | Y | Y | 4 | Y |
| Charlson Comorbidity Index | Y | Y | Y | Y | 4 | Y |
| Total Procedures | Y | Y | Y | Y | 4 | Y |
| Length of Stay (days) | Y | Y | Y | Y | 4 | Y |
| Congestive Heart Failure | Y | Y | Y | Y | 4 | Y |
| CVD Mortality Risk | Y | Y | Y | Y | 4 | Y |
| Depression | Y | Y | Y | Y | 4 | Y |
| Renal Failure | Y | Y | Y | Y | 4 | Y |
| LACE: Length of Stay | Y | Y | Y | Y | 4 | Y |
| Other Neurological Disorder | Y | Y | Y | Y | 4 | Y |
| Peripheral Vascular Disease | Y | Y | Y | Y | 4 | Y |
| Hypertension, Uncomplicated | Y | Y | Y | Y | 4 | Y |
| Fluid and Electrolyte Disorder | Y | Y | Y | Y | 4 | Y |
| Chronic Pulmonary Disease | Y | Y | Y | Y | 4 | Y |
| Cardiac Arrhythmia | Y | Y | Y | Y | 4 | Y |
| Valvular Disease | Y | Y | Y | Y | 4 | Y |
| Pulmonary Circulation Disorder | Y | Y | Y | Y | 4 | Y |
| Diabetes with Complications | Y | Y | Y | Y | 4 | Y |
| Admission Year | Y | Y |  | Y | 3 | Y |
| van Walraven Elixhauser Index | Y | Y | Y |  | 3 | Y |
| Age (years) | Y | Y | Y |  | 3 | Y |
| Elixhauser Comorbidity Count | Y | Y | Y |  | 3 | Y |
| Age-Adjusted Charlson Index | Y | Y | Y |  | 3 | Y |
| Total Charges ($) | Y | Y |  | Y | 3 | Y |
| Hospital Ownership | Y | Y |  | Y | 3 | Y |
| CVD Severity Score | Y | Y | Y |  | 3 | Y |
| Hospital Size (beds) | Y | Y |  | Y | 3 | Y |
| Teaching Hospital | Y | Y |  | Y | 3 | Y |
| Drug Abuse | Y | Y |  | Y | 3 | Y |
| Female Sex | Y | Y |  | Y | 3 | Y |
| Diabetes, Uncomplicated | Y | Y |  | Y | 3 | Y |
| Hypertension, Complicated | Y |  | Y | Y | 3 | Y |
| Admission Quarter |  | Y |  | Y | 2 | Y |
| LACE: Acuity | Y |  |  | Y | 2 | Y |
| Hypothyroidism | Y |  |  | Y | 2 | Y |
| Deficiency Anemia | Y |  |  | Y | 2 | Y |
| Alcohol Abuse | Y |  |  | Y | 2 | Y |
| Age >= 75 years | Y |  |  | Y | 2 | Y |
| Coagulopathy | Y |  |  | Y | 2 | Y |

Features endorsed by at least 2 of 4 methods were retained for model development. Y indicates selection by the corresponding method. A total of 45 of 60 candidate features met the consensus threshold. Abbreviations: SHAP, Shapley additive explanations; RFE, recursive feature elimination with cross-validation; mRMR, minimum redundancy maximum relevance; Y, selected.

**Supplementary Table S2.** Discrimination and Calibration Performance for All 40 Models

| **Config** | **CVD Category** | **Algorithm** | **AUC (95% CI)** | **AUPRC** | **Sens** | **Spec** | **PPV** | **F1** | **Brier** | **Utility** |
| --- | --- | --- | --- | --- | --- | --- | --- | --- | --- | --- |
| Bal | AMI | Elastic Net | 0.697 (0.679-0.713) | 0.266 | 0.679 | 0.607 | 0.202 | 0.311 | 0.2028 | Limited |
| Bal | AMI | XGBoost | 0.695 (0.679-0.71) | 0.264 | 0.706 | 0.577 | 0.196 | 0.307 | 0.1588 | Limited |
| Bal | AMI | LightGBM | 0.695 (0.679-0.71) | 0.26 | 0.674 | 0.613 | 0.203 | 0.312 | 0.1066 | Limited |
| Bal | AMI | Super Learner | 0.692 (0.678-0.708) | 0.261 | 0.617 | 0.675 | 0.217 | 0.321 | 0.1112 | Limited |
| Bal | AMI | Random Forest | 0.682 (0.665-0.699) | 0.249 | 0.62 | 0.653 | 0.207 | 0.31 | 0.1083 | Limited |
| Unbal | AMI | XGBoost | 0.706 (0.691-0.721) | 0.275 | 0.571 | 0.728 | 0.235 | 0.333 | 0.2125 | Moderate |
| Unbal | AMI | Super Learner | 0.706 (0.689-0.723) | 0.273 | 0.621 | 0.679 | 0.221 | 0.326 | 0.1042 | Moderate |
| Unbal | AMI | LightGBM | 0.705 (0.69-0.719) | 0.276 | 0.708 | 0.591 | 0.202 | 0.314 | 0.1891 | Moderate |
| Unbal | AMI | Elastic Net | 0.689 (0.673-0.704) | 0.257 | 0.592 | 0.691 | 0.219 | 0.319 | 0.105 | Limited |
| Unbal | AMI | Random Forest | 0.688 (0.673-0.705) | 0.248 | 0.506 | 0.767 | 0.241 | 0.327 | 0.1315 | Limited |
| Bal | AF/AFL | XGBoost | 0.732 (0.715-0.75) | 0.339 | 0.708 | 0.648 | 0.271 | 0.392 | 0.1204 | Moderate |
| Bal | AF/AFL | Super Learner | 0.73 (0.712-0.748) | 0.344 | 0.715 | 0.629 | 0.263 | 0.384 | 0.2457 | Moderate |
| Bal | AF/AFL | Elastic Net | 0.729 (0.712-0.747) | 0.34 | 0.728 | 0.617 | 0.26 | 0.383 | 0.1977 | Moderate |
| Bal | AF/AFL | LightGBM | 0.725 (0.707-0.743) | 0.33 | 0.672 | 0.666 | 0.271 | 0.387 | 0.1224 | Moderate |
| Bal | AF/AFL | Random Forest | 0.714 (0.695-0.732) | 0.32 | 0.628 | 0.688 | 0.271 | 0.379 | 0.1228 | Moderate |
| Unbal | AF/AFL | XGBoost | 0.731 (0.714-0.749) | 0.339 | 0.658 | 0.684 | 0.278 | 0.391 | 0.2115 | Moderate |
| Unbal | AF/AFL | Super Learner | 0.73 (0.712-0.748) | 0.337 | 0.62 | 0.721 | 0.291 | 0.396 | 0.1195 | Moderate |
| Unbal | AF/AFL | LightGBM | 0.728 (0.709-0.746) | 0.34 | 0.6 | 0.745 | 0.303 | 0.403 | 0.1543 | Moderate |
| Unbal | AF/AFL | Elastic Net | 0.725 (0.708-0.742) | 0.336 | 0.598 | 0.736 | 0.295 | 0.395 | 0.1206 | Moderate |
| Unbal | AF/AFL | Random Forest | 0.719 (0.701-0.736) | 0.321 | 0.628 | 0.704 | 0.282 | 0.389 | 0.1442 | Moderate |
| Bal | HF | XGBoost | 0.708 (0.701-0.716) | 0.418 | 0.632 | 0.68 | 0.364 | 0.462 | 0.1577 | Moderate |
| Bal | HF | LightGBM | 0.708 (0.701-0.716) | 0.419 | 0.667 | 0.643 | 0.352 | 0.461 | 0.1574 | Moderate |
| Bal | HF | Super Learner | 0.704 (0.697-0.711) | 0.414 | 0.657 | 0.646 | 0.35 | 0.456 | 0.1616 | Moderate |
| Bal | HF | Elastic Net | 0.697 (0.69-0.705) | 0.407 | 0.622 | 0.676 | 0.357 | 0.454 | 0.2051 | Limited |
| Bal | HF | Random Forest | 0.695 (0.688-0.702) | 0.404 | 0.55 | 0.743 | 0.383 | 0.452 | 0.1599 | Limited |
| Unbal | HF | XGBoost | 0.707 (0.7-0.714) | 0.418 | 0.678 | 0.63 | 0.347 | 0.459 | 0.2146 | Moderate |
| Unbal | HF | LightGBM | 0.707 (0.7-0.715) | 0.419 | 0.625 | 0.685 | 0.365 | 0.461 | 0.2138 | Moderate |
| Unbal | HF | Super Learner | 0.707 (0.7-0.714) | 0.417 | 0.607 | 0.703 | 0.372 | 0.461 | 0.158 | Moderate |
| Unbal | HF | Elastic Net | 0.696 (0.689-0.704) | 0.408 | 0.598 | 0.701 | 0.367 | 0.455 | 0.1598 | Limited |
| Unbal | HF | Random Forest | 0.695 (0.687-0.702) | 0.4 | 0.615 | 0.682 | 0.359 | 0.453 | 0.1795 | Limited |
| Bal | HHD | XGBoost | 0.758 (0.735-0.777) | 0.338 | 0.734 | 0.652 | 0.223 | 0.342 | 0.1156 | High |
| Bal | HHD | Super Learner | 0.752 (0.729-0.773) | 0.338 | 0.609 | 0.762 | 0.258 | 0.362 | 0.0974 | High |
| Bal | HHD | LightGBM | 0.75 (0.727-0.772) | 0.336 | 0.58 | 0.78 | 0.264 | 0.362 | 0.0948 | High |
| Bal | HHD | Elastic Net | 0.746 (0.723-0.769) | 0.324 | 0.711 | 0.661 | 0.222 | 0.338 | 0.171 | Moderate |
| Bal | HHD | Random Forest | 0.742 (0.719-0.765) | 0.327 | 0.605 | 0.75 | 0.247 | 0.351 | 0.0966 | Moderate |
| Unbal | HHD | Super Learner | 0.754 (0.732-0.775) | 0.338 | 0.68 | 0.698 | 0.234 | 0.348 | 0.0957 | High |
| Unbal | HHD | XGBoost | 0.753 (0.732-0.775) | 0.326 | 0.693 | 0.692 | 0.234 | 0.35 | 0.2238 | High |
| Unbal | HHD | LightGBM | 0.753 (0.73-0.775) | 0.328 | 0.635 | 0.744 | 0.252 | 0.361 | 0.1086 | High |
| Unbal | HHD | Random Forest | 0.744 (0.721-0.766) | 0.332 | 0.652 | 0.707 | 0.232 | 0.342 | 0.1151 | Moderate |
| Unbal | HHD | Elastic Net | 0.733 (0.71-0.756) | 0.312 | 0.725 | 0.652 | 0.22 | 0.338 | 0.0955 | Moderate |

Forty models comprising 5 base algorithms across 4 CVD categories and 2 dataset configurations, plus 8 Super Learner ensembles. Utility classification: High (AUC >= 0.75), Moderate (0.70-0.74), Limited (< 0.70). Abbreviations: AUC, area under the receiver operating characteristic curve; AUPRC, area under the precision-recall curve; Bal, SMOTE-balanced configuration; CI, confidence interval; CVD, cardiovascular disease; PPV, positive predictive value; Sens, sensitivity; SMOTE, synthetic minority oversampling technique; Spec, specificity; Unbal, unbalanced configuration with class weights.

**Supplementary Table S3.** DeLong Pairwise Comparisons of Algorithm Discrimination Within the Best-Performing Dataset Configuration per CVD Category

| **CVD Category** | **Config** | **Model 1** | **Model 2** | **AUC 1** | **AUC 2** | **Z** | **P-value** | **Sig?** |
| --- | --- | --- | --- | --- | --- | --- | --- | --- |
| HF | Bal | XGBoost | LightGBM | 0.708 | 0.708 | -0.904 | 0.366 | No |
| HF | Bal | XGBoost | Super Learner | 0.708 | 0.704 | 3.835 | 0.000126 | Yes |
| HF | Bal | XGBoost | Elastic Net | 0.708 | 0.697 | 7.634 | 2.27e-14 | Yes |
| HF | Bal | XGBoost | Random Forest | 0.708 | 0.695 | 8.051 | 8.22e-16 | Yes |
| HF | Bal | LightGBM | Super Learner | 0.708 | 0.704 | 4.698 | 2.63e-06 | Yes |
| HF | Bal | LightGBM | Elastic Net | 0.708 | 0.697 | 7.354 | 1.92e-13 | Yes |
| HF | Bal | LightGBM | Random Forest | 0.708 | 0.695 | 8.542 | 1.32e-17 | Yes |
| HF | Bal | Super Learner | Elastic Net | 0.704 | 0.697 | 4.022 | 5.77e-05 | Yes |
| HF | Bal | Super Learner | Random Forest | 0.704 | 0.695 | 13.255 | 4.2e-40 | Yes |
| HF | Bal | Elastic Net | Random Forest | 0.697 | 0.695 | 0.939 | 0.348 | No |
| AF/AFL | Bal | XGBoost | Super Learner | 0.732 | 0.73 | 0.699 | 0.484 | No |
| AF/AFL | Bal | XGBoost | Elastic Net | 0.732 | 0.729 | 0.923 | 0.356 | No |
| AF/AFL | Bal | XGBoost | LightGBM | 0.732 | 0.725 | 3.55 | 0.000385 | Yes |
| AF/AFL | Bal | XGBoost | Random Forest | 0.732 | 0.714 | 5.038 | 4.72e-07 | Yes |
| AF/AFL | Bal | Super Learner | Elastic Net | 0.73 | 0.729 | 2.261 | 0.0238 | Yes |
| AF/AFL | Bal | Super Learner | LightGBM | 0.73 | 0.725 | 1.376 | 0.169 | No |
| AF/AFL | Bal | Super Learner | Random Forest | 0.73 | 0.714 | 3.411 | 0.000648 | Yes |
| AF/AFL | Bal | Elastic Net | LightGBM | 0.729 | 0.725 | 0.99 | 0.322 | No |
| AF/AFL | Bal | Elastic Net | Random Forest | 0.729 | 0.714 | 2.967 | 0.00301 | Yes |
| AF/AFL | Bal | LightGBM | Random Forest | 0.725 | 0.714 | 3.719 | 0.0002 | Yes |
| AMI | Unbal | XGBoost | Super Learner | 0.706 | 0.706 | 0.705 | 0.481 | No |
| AMI | Unbal | XGBoost | LightGBM | 0.706 | 0.705 | 0.842 | 0.4 | No |
| AMI | Unbal | XGBoost | Elastic Net | 0.706 | 0.689 | 6.097 | 1.08e-09 | Yes |
| AMI | Unbal | XGBoost | Random Forest | 0.706 | 0.688 | 4.764 | 1.9e-06 | Yes |
| AMI | Unbal | Super Learner | LightGBM | 0.706 | 0.705 | 0.522 | 0.602 | No |
| AMI | Unbal | Super Learner | Elastic Net | 0.706 | 0.689 | 5.384 | 7.27e-08 | Yes |
| AMI | Unbal | Super Learner | Random Forest | 0.706 | 0.688 | 5.892 | 3.82e-09 | Yes |
| AMI | Unbal | LightGBM | Elastic Net | 0.705 | 0.689 | 5.298 | 1.17e-07 | Yes |
| AMI | Unbal | LightGBM | Random Forest | 0.705 | 0.688 | 5.049 | 4.44e-07 | Yes |
| AMI | Unbal | Elastic Net | Random Forest | 0.689 | 0.688 | 0.138 | 0.89 | No |
| HHD | Bal | XGBoost | Super Learner | 0.758 | 0.752 | 1.36 | 0.174 | No |
| HHD | Bal | XGBoost | LightGBM | 0.758 | 0.75 | 1.661 | 0.0968 | No |
| HHD | Bal | XGBoost | Elastic Net | 0.758 | 0.746 | 1.865 | 0.0622 | No |
| HHD | Bal | XGBoost | Random Forest | 0.758 | 0.742 | 2.513 | 0.012 | Yes |
| HHD | Bal | Super Learner | LightGBM | 0.752 | 0.75 | 0.489 | 0.625 | No |
| HHD | Bal | Super Learner | Elastic Net | 0.752 | 0.746 | 0.751 | 0.452 | No |
| HHD | Bal | Super Learner | Random Forest | 0.752 | 0.742 | 4.279 | 1.88e-05 | Yes |
| HHD | Bal | LightGBM | Elastic Net | 0.75 | 0.746 | 0.464 | 0.643 | No |
| HHD | Bal | LightGBM | Random Forest | 0.75 | 0.742 | 1.33 | 0.183 | No |
| HHD | Bal | Elastic Net | Random Forest | 0.746 | 0.742 | 0.518 | 0.604 | No |

DeLong tests for correlated receiver operating characteristic curves comparing all algorithm pairs within each CVD category and dataset configuration. Statistical significance assessed at alpha = 0.05. Abbreviations: AUC, area under the receiver operating characteristic curve; Bal, SMOTE-balanced configuration; CVD, cardiovascular disease; Sig, statistically significant; SMOTE, synthetic minority oversampling technique; Unbal, unbalanced configuration with class weights; Z, DeLong test statistic.

**Supplementary Table S4.** Generalized Estimating Equation Validation of Within-Patient Correlation

| **CVD Category** | **Algorithm** | **Config** | **AUC** | **N Rec** | **N Clust** | **% Clust** | **Alpha** | **Wald P** | **Note** |
| --- | --- | --- | --- | --- | --- | --- | --- | --- | --- |
| HF | XGBoost | Bal | 0.708 | 11295 | 4064 | 39.8 | 0.1198 | 5.88e-15 | Significant |
| AF/AFL | XGBoost | Bal | 0.732 | 1067 | 461 | 18.8 | 0.1704 | 0.229 | Not significant |
| AMI | XGBoost | Unbal | 0.706 | 1517 | 708 | 16.8 | 0.0413 | 1.65e-12 | Significant |
| HHD | XGBoost | Bal | 0.758 | 433 | 173 | 10.1 | 0.1408 | 0.0169 | Significant |

GEE models with exchangeable working correlation structure and sandwich (robust) standard errors fitted to multi-admission patient subsets within each test partition. Alpha represents the exchangeable correlation estimate. Wald P indicates significance of model-predicted risk as a readmission predictor after accounting for within-patient correlation. Abbreviations: AUC, area under the receiver operating characteristic curve; Bal, SMOTE-balanced configuration; Clust, clusters (unique patients); CVD, cardiovascular disease; GEE, generalized estimating equations; N Rec, number of records; SMOTE, synthetic minority oversampling technique; Unbal, unbalanced configuration with class weights.

**Supplementary Table S5.** Clustered Bootstrap Confidence Intervals Compared With Standard Bootstrap

| **CVD Category** | **Algorithm** | **Config** | **AUC** | **Std CI** | **Std Width** | **Clust CI** | **Clust Width** | **Width Ratio** |
| --- | --- | --- | --- | --- | --- | --- | --- | --- |
| HF | XGBoost | Bal | 0.708 | 0.701–0.716 | 0.015 | 0.7–0.716 | 0.0164 | 1.096 |
| AF/AFL | XGBoost | Bal | 0.732 | 0.715–0.75 | 0.035 | 0.711–0.753 | 0.0415 | 1.185 |
| AMI | XGBoost | Unbal | 0.706 | 0.691–0.721 | 0.03 | 0.692–0.722 | 0.0306 | 1.018 |
| HHD | XGBoost | Bal | 0.758 | 0.735–0.777 | 0.042 | 0.733–0.784 | 0.0509 | 1.212 |

Patient-resampled clustered bootstrap (1000 iterations) compared with standard record-level bootstrap. Width Ratio represents clustered CI width divided by standard CI width; mean ratio across all models = 1.13 (13% widening), indicating modest but consistent variance underestimation under independence assumptions. Abbreviations: AUC, area under the receiver operating characteristic curve; Bal, SMOTE-balanced configuration; CI, confidence interval; Clust, clustered bootstrap; CVD, cardiovascular disease; SMOTE, synthetic minority oversampling technique; Std, standard (record-level) bootstrap; Unbal, unbalanced configuration with class weights.

**Supplementary Table S6.** Best-Model Discrimination Stratified by Admission Order

| **CVD Category** | **Algorithm** | **Stratum** | **N** | **Event %** | **AUC (95% CI)** | **Sens** | **Spec** |
| --- | --- | --- | --- | --- | --- | --- | --- |
| HF | XGBoost | First | 20284 | 15.4 | 0.635 (0.624-0.644) | 0.619 | 0.582 |
| HF | XGBoost | Repeat | 8096 | 40.2 | 0.603 (0.59-0.616) | 0.441 | 0.712 |
| AF/AFL | XGBoost | First | 4711 | 11.5 | 0.68 (0.656-0.702) | 0.522 | 0.743 |
| AF/AFL | XGBoost | Repeat | 966 | 35.7 | 0.612 (0.573-0.648) | 0.803 | 0.369 |
| AMI | XGBoost | First | 7833 | 10.7 | 0.673 (0.655-0.692) | 0.596 | 0.655 |
| AMI | XGBoost | Repeat | 1211 | 25.9 | 0.691 (0.662-0.722) | 0.79 | 0.514 |
| HHD | XGBoost | First | 3870 | 9 | 0.699 (0.672-0.727) | 0.683 | 0.638 |
| HHD | XGBoost | Repeat | 413 | 40 | 0.657 (0.606-0.709) | 0.691 | 0.605 |

Performance of the best-performing algorithm (XGBoost) stratified by first versus repeat admissions within each test partition. Event % denotes the 30-day readmission rate within stratum. Abbreviations: AUC, area under the receiver operating characteristic curve; CI, confidence interval; CVD, cardiovascular disease; N, sample size; Sens, sensitivity; Spec, specificity.

**Supplementary Table S7.** Aggregated Feature Importance Rankings Across All 40 Base Models

| **Feature** | **Mean Importance** | **Models (of 40)** |
| --- | --- | --- |
| LACE: ED Visits | 0.8328 | 32 |
| Admission Order | 0.3258 | 29 |
| CVD Mortality Risk | 0.2843 | 27 |
| LACE Index (0-19) | 0.2667 | 32 |
| Total Charges ($) | 0.2555 | 26 |
| Age (years) | 0.2296 | 24 |
| Renal Failure | 0.1751 | 28 |
| Charlson Comorbidity Index | 0.1701 | 30 |
| van Walraven Elixhauser Index | 0.1682 | 29 |
| Insurance Type | 0.1475 | 29 |
| Length of Stay (days) | 0.1440 | 24 |
| Total Diagnoses | 0.1363 | 32 |
| Admission Year | 0.1350 | 31 |
| CVD Severity Score | 0.1294 | 29 |
| Elixhauser Comorbidity Count | 0.1249 | 31 |
| Age-Adjusted Charlson Index | 0.1176 | 29 |
| Obesity | 0.1138 | 30 |
| Teaching Status (Missing) | 0.1099 | 11 |
| Total CVD Conditions | 0.1046 | 28 |
| Hypertension, Complicated | 0.1017 | 25 |
| Congestive Heart Failure | 0.0996 | 28 |
| Total Procedures | 0.0930 | 29 |
| Female Sex | 0.0924 | 27 |
| Hospital Size (beds) | 0.0892 | 26 |
| Admission Quarter | 0.0867 | 25 |
| LACE: Length of Stay | 0.0862 | 27 |
| Teaching Hospital | 0.0748 | 25 |
| Fluid and Electrolyte Disorder | 0.0729 | 26 |
| Chronic Pulmonary Disease | 0.0724 | 24 |
| Hypertension, Uncomplicated | 0.0600 | 28 |
| Diabetes with Complications | 0.0524 | 23 |
| Age >= 75 years | 0.0512 | 23 |
| Cardiac Arrhythmia | 0.0496 | 25 |
| Diabetes, Uncomplicated | 0.0492 | 23 |
| Depression | 0.0432 | 25 |
| Drug Abuse | 0.0423 | 29 |
| Coagulopathy | 0.0421 | 27 |
| Hospital Ownership | 0.0403 | 26 |
| Other Neurological Disorder | 0.0390 | 28 |
| Valvular Disease | 0.0335 | 26 |
| Pulmonary Circulation Disorder | 0.0285 | 22 |
| Alcohol Abuse | 0.0281 | 24 |
| Deficiency Anemia | 0.0261 | 24 |
| Peripheral Vascular Disease | 0.0256 | 25 |
| Hypothyroidism | 0.0220 | 22 |
| LACE: Acuity | 0.0198 | 27 |
| Tax Status (Missing) | 0.0000 | 8 |

Mean normalized importance (scaled 0 to 1) averaged across all base models in which the feature was retained (minimum 3 models). Features ranked by descending mean importance. Abbreviations: CCI, Charlson comorbidity index; ED, emergency department; ICU, intensive care unit; LOS, length of stay; SDI, social deprivation index; SNF, skilled nursing facility.

**Supplementary Table S8.** Elastic Net Coefficient Vectors by CVD Category and Configuration

| **Feature** | **Coefficient** | **Odds Ratio** |
| --- | --- | --- |
| **Heart Failure | unbalanced** | | |
| LACE: ED Visits | 0.4458 | 1.5618 |
| Obesity | -0.1194 | 0.8874 |
| Drug Abuse | 0.0768 | 1.0798 |
| Other Neurological Disorder | 0.0706 | 1.0731 |
| Elixhauser Comorbidity Count | 0.0337 | 1.0343 |
| LACE Index (0-19) | 0.0320 | 1.0325 |
| Congestive Heart Failure | -0.0249 | 0.9754 |
| Admission Order | 0.0221 | 1.0223 |
| Charlson Comorbidity Index | 0.0210 | 1.0212 |
| Admission Year | -0.0197 | 0.9805 |
| Renal Failure | 0.0189 | 1.0191 |
| Total Diagnoses | 0.0146 | 1.0147 |
| Total CVD Conditions | -0.0073 | 0.9927 |
| van Walraven Elixhauser Index | 0.0026 | 1.0026 |
| Total Procedures | -0.0022 | 0.9978 |
| **Heart Failure | balanced** | | |
| LACE: ED Visits | 0.5793 | 1.7848 |
| Obesity | -0.2160 | 0.8057 |
| Drug Abuse | 0.1495 | 1.1613 |
| Other Neurological Disorder | 0.1418 | 1.1524 |
| Congestive Heart Failure | -0.0798 | 0.9233 |
| LACE Index (0-19) | 0.0411 | 1.0419 |
| Total Diagnoses | 0.0405 | 1.0414 |
| Elixhauser Comorbidity Count | 0.0404 | 1.0412 |
| Age >= 75 years | -0.0401 | 0.9607 |
| Total CVD Conditions | -0.0367 | 0.9640 |
| Admission Year | -0.0362 | 0.9645 |
| Hospital Ownership | 0.0332 | 1.0337 |
| Depression | 0.0317 | 1.0322 |
| Charlson Comorbidity Index | 0.0281 | 1.0285 |
| Total Procedures | -0.0267 | 0.9737 |
| Renal Failure | 0.0239 | 1.0242 |
| Valvular Disease | -0.0125 | 0.9876 |
| Admission Order | 0.0120 | 1.0121 |
| Cardiac Arrhythmia | 0.0106 | 1.0107 |
| Hospital Size (beds) | -0.0083 | 0.9918 |
| van Walraven Elixhauser Index | 0.0045 | 1.0045 |
| Peripheral Vascular Disease | -0.0040 | 0.9960 |
| CVD Severity Score | -0.0011 | 0.9989 |
| Admission Quarter | -0.0002 | 0.9998 |
| Insurance Type | 0.0000 | 1.0000 |
| **Atrial Fibrillation/Flutter | unbalanced** | | |
| LACE: ED Visits | 0.5113 | 1.6674 |
| LACE Index (0-19) | 0.0694 | 1.0719 |
| CVD Severity Score | 0.0277 | 1.0281 |
| Age-Adjusted Charlson Index | 0.0212 | 1.0214 |
| Total Diagnoses | 0.0142 | 1.0143 |
| van Walraven Elixhauser Index | 0.0110 | 1.0111 |
| Admission Year | -0.0003 | 0.9997 |
| **Atrial Fibrillation/Flutter | balanced** | | |
| LACE: ED Visits | 0.8939 | 2.4446 |
| CVD Severity Score | 0.2465 | 1.2795 |
| Teaching Status (Missing) | -0.1970 | 0.8212 |
| Drug Abuse | 0.1562 | 1.1690 |
| Obesity | -0.1084 | 0.8973 |
| LACE: Length of Stay | 0.0659 | 1.0682 |
| Insurance Type | 0.0656 | 1.0678 |
| Age-Adjusted Charlson Index | 0.0411 | 1.0420 |
| Admission Year | -0.0406 | 0.9602 |
| LACE Index (0-19) | 0.0398 | 1.0406 |
| Total Diagnoses | 0.0298 | 1.0303 |
| Total CVD Conditions | -0.0286 | 0.9718 |
| Charlson Comorbidity Index | 0.0250 | 1.0253 |
| Diabetes, Uncomplicated | 0.0248 | 1.0251 |
| Teaching Hospital | -0.0220 | 0.9782 |
| Hypertension, Uncomplicated | -0.0165 | 0.9836 |
| van Walraven Elixhauser Index | 0.0163 | 1.0165 |
| Elixhauser Comorbidity Count | 0.0141 | 1.0142 |
| Coagulopathy | 0.0061 | 1.0062 |
| LACE: Acuity | -0.0049 | 0.9951 |
| Hospital Ownership | 0.0031 | 1.0031 |
| Female Sex | 0.0009 | 1.0009 |
| Total Charges ($) | -0.0000 | 1.0000 |
| **Acute Myocardial Infarction | unbalanced** | | |
| LACE: ED Visits | 0.2205 | 1.2466 |
| Admission Order | 0.1279 | 1.1365 |
| CVD Mortality Risk | 0.0972 | 1.1021 |
| CVD Severity Score | 0.0897 | 1.0939 |
| LACE: Length of Stay | 0.0490 | 1.0502 |
| LACE Index (0-19) | 0.0428 | 1.0437 |
| Hypertension, Uncomplicated | -0.0359 | 0.9647 |
| Elixhauser Comorbidity Count | 0.0335 | 1.0341 |
| Female Sex | 0.0314 | 1.0319 |
| Renal Failure | 0.0247 | 1.0250 |
| Charlson Comorbidity Index | 0.0241 | 1.0244 |
| Age-Adjusted Charlson Index | 0.0206 | 1.0208 |
| Total Diagnoses | 0.0125 | 1.0126 |
| Obesity | -0.0111 | 0.9889 |
| Admission Year | -0.0079 | 0.9921 |
| Hypertension, Complicated | 0.0064 | 1.0064 |
| van Walraven Elixhauser Index | 0.0049 | 1.0049 |
| Insurance Type | 0.0029 | 1.0029 |
| Total Procedures | -0.0020 | 0.9980 |
| Congestive Heart Failure | 0.0015 | 1.0015 |
| **Acute Myocardial Infarction | balanced** | | |
| LACE: ED Visits | 0.4406 | 1.5536 |
| Coagulopathy | -0.2578 | 0.7728 |
| CVD Severity Score | 0.2262 | 1.2539 |
| Obesity | -0.2213 | 0.8015 |
| Admission Order | 0.1660 | 1.1805 |
| CVD Mortality Risk | 0.1622 | 1.1761 |
| Hypertension, Uncomplicated | -0.1560 | 0.8556 |
| Alcohol Abuse | 0.1314 | 1.1404 |
| Female Sex | 0.1275 | 1.1360 |
| LACE: Length of Stay | 0.1017 | 1.1071 |
| Deficiency Anemia | 0.0944 | 1.0990 |
| LACE Index (0-19) | 0.0668 | 1.0691 |
| Elixhauser Comorbidity Count | 0.0635 | 1.0656 |
| Hospital Ownership | 0.0607 | 1.0626 |
| Hospital Size (beds) | -0.0492 | 0.9520 |
| Chronic Pulmonary Disease | 0.0407 | 1.0415 |
| Admission Year | -0.0387 | 0.9620 |
| Insurance Type | 0.0383 | 1.0390 |
| LACE: Acuity | -0.0381 | 0.9626 |
| Total Procedures | -0.0303 | 0.9702 |
| Other Neurological Disorder | -0.0272 | 0.9732 |
| Total Diagnoses | 0.0258 | 1.0261 |
| Drug Abuse | 0.0237 | 1.0239 |
| Depression | 0.0178 | 1.0180 |
| Fluid and Electrolyte Disorder | 0.0174 | 1.0176 |
| Charlson Comorbidity Index | 0.0165 | 1.0167 |
| Age-Adjusted Charlson Index | 0.0151 | 1.0152 |
| Peripheral Vascular Disease | 0.0105 | 1.0106 |
| **Hypertensive Heart Disease | unbalanced** | | |
| LACE: ED Visits | 0.5641 | 1.7578 |
| LACE Index (0-19) | 0.0798 | 1.0830 |
| Total Diagnoses | 0.0205 | 1.0207 |
| Elixhauser Comorbidity Count | 0.0103 | 1.0104 |
| Admission Order | 0.0047 | 1.0047 |
| **Hypertensive Heart Disease | balanced** | | |
| LACE: ED Visits | 0.9976 | 2.7116 |
| Teaching Status (Missing) | 0.9589 | 2.6087 |
| Depression | 0.3150 | 1.3702 |
| Obesity | -0.2921 | 0.7467 |
| Coagulopathy | 0.1205 | 1.1281 |
| Other Neurological Disorder | 0.1013 | 1.1066 |
| Valvular Disease | -0.0958 | 0.9086 |
| LACE Index (0-19) | 0.0777 | 1.0808 |
| LACE: Acuity | -0.0749 | 0.9279 |
| Fluid and Electrolyte Disorder | 0.0549 | 1.0565 |
| CVD Mortality Risk | 0.0531 | 1.0545 |
| Total Diagnoses | 0.0499 | 1.0512 |
| Congestive Heart Failure | -0.0440 | 0.9570 |
| Elixhauser Comorbidity Count | 0.0424 | 1.0433 |
| Drug Abuse | 0.0387 | 1.0395 |
| Renal Failure | 0.0317 | 1.0323 |
| Admission Year | -0.0239 | 0.9764 |
| Charlson Comorbidity Index | 0.0192 | 1.0194 |
| Insurance Type | 0.0181 | 1.0183 |
| Hypertension, Uncomplicated | -0.0158 | 0.9843 |
| Total CVD Conditions | -0.0096 | 0.9904 |
| Total Procedures | 0.0024 | 1.0024 |
| Age-Adjusted Charlson Index | 0.0022 | 1.0023 |

Non-zero elastic net coefficients with regularization parameter lambda selected by the one-standard-error rule. Coefficients enable exact reproduction of predicted probabilities: log-odds(readmission) = intercept + sum(beta_j * x_j). Odds ratios represent exp(coefficient). Abbreviations: Bal, SMOTE-balanced configuration; CVD, cardiovascular disease; OR, odds ratio; SMOTE, synthetic minority oversampling technique; Unbal, unbalanced configuration with class weights. Note: Because 30-day readmission rates exceed 10% in all CVD categories, odds ratios from logistic-scale coefficients should not be interpreted as relative risks. An OR of 1.5 does not indicate 50% higher risk when the outcome is common; consult the calibration analysis (Figure 4) for absolute risk interpretation.

**Supplementary Table S9. Sensitivity and Specificity Tradeoffs Between Balanced (SMOTE) and Unbalanced Dataset Configurations.**

| **CVD Category** | **Event Rate** | **AUC** | **Sens** | **Spec** | **PPV** | **NPV** | **AUC** | **Sens** | **Spec** | **PPV** | **NPV** | **Δ Sens** | **Δ Spec** |
| --- | --- | --- | --- | --- | --- | --- | --- | --- | --- | --- | --- | --- | --- |
| AMI | 12.8% | 0.706 | 0.571 | 0.728 | 0.235 | 0.921 | 0.695 | 0.706 | 0.577 | 0.196 | 0.931 | +0.135 | -0.151 |
| AF/AFL | 15.6% | 0.731 | 0.658 | 0.684 | 0.278 | 0.915 | 0.732 | 0.708 | 0.648 | 0.271 | 0.923 | +0.050 | -0.036 |
| HF | 22.5% | 0.707 | 0.678 | 0.630 | 0.347 | 0.871 | 0.708 | 0.632 | 0.680 | 0.364 | 0.864 | -0.046 | +0.050 |
| HHD | 12.0% | 0.753 | 0.693 | 0.692 | 0.234 | 0.943 | 0.758 | 0.734 | 0.652 | 0.223 | 0.948 | +0.041 | -0.040 |

SMOTE = Synthetic Minority Oversampling Technique (K=5 neighbors), applied to training set only. Balanced configurations apply SMOTE; unbalanced configurations use the natural class distribution. PPV = positive predictive value; NPV = negative predictive value. Best algorithm (XGBoost) shown for each CVD category. Abbreviations: AUC, area under the receiver operating characteristic curve; CVD, cardiovascular disease; HF, heart failure; AMI, acute myocardial infarction; AF/AFL, atrial fibrillation/atrial flutter; HHD, hypertensive heart disease; NPV, negative predictive value; PPV, positive predictive value; SMOTE, Synthetic Minority Over-sampling Technique. Event rates in this table reflect the 30% held-out test partition and may differ slightly from full-cohort rates reported in the main text (e.g., HHD test-set rate 12.0% vs. full-cohort 12.4%).

**Supplementary Table S10. Comparison of Key Clinical Features Across ICD-9 (2010–2015 Q3) and ICD-10 (2015 Q4–2020) Coding Eras.**

**30-Day Readmission Rate by Coding Era and CVD Category**

| **Coding Era** | **CVD Category** | | | **N** | | **Readmission Rate** | |
| --- | --- | --- | --- | --- | --- | --- | --- |
| ICD-10 (2015Q4-2020) | AMI | | | 15,259 | | 12.3% | |
| ICD-10 (2015Q4-2020) | AF/AFL | | | 9,176 | | 14.4% | |
| ICD-10 (2015Q4-2020) | HF | | | 51,227 | | 21.6% | |
| ICD-10 (2015Q4-2020) | HHD | | | 8,233 | | 14.2% | |
| ICD-9 (2010-2015Q3) | AMI | | | 14,867 | | 13.7% | |
| ICD-9 (2010-2015Q3) | AF/AFL | | | 9,606 | | 16.3% | |
| ICD-9 (2010-2015Q3) | HF | | | 43,335 | | 23.6% | |
| ICD-9 (2010-2015Q3) | HHD | | | 6,088 | | 9.9% | |
| **Variable** | | **Overall (N=157,791)** | **ICD-10 Era (n=83,895)** | | **ICD-9 Era (n=73,896)** | | **SMD** |
| LACE Index (0–19), mean (SD) | | 9.67 (3.02) | 10.01 (2.96) | | 9.28 (3.04) | | 0.244 |
| Charlson Comorbidity Index, mean (SD) | | 3.15 (2.05) | 3.51 (2.11) | | 2.73 (1.90) | | 0.389 |
| Age-Adjusted Charlson, mean (SD) | | 5.04 (2.65) | 5.43 (2.68) | | 4.60 (2.53) | | 0.318 |
| van Walraven Elixhauser Index, mean (SD) | | 11.99 (8.74) | 12.89 (8.63) | | 10.96 (8.75) | | 0.223 |
| Elixhauser Comorbidity Count, mean (SD) | | 4.63 (2.00) | 4.75 (1.84) | | 4.50 (2.15) | | 0.124 |
| Total diagnoses, mean (SD) | | 14.41 (4.14) | 15.39 (3.65) | | 13.29 (4.38) | | 0.520 |
| LACE-L (Length of Stay Score), mean (SD) | | 3.36 (1.53) | 3.40 (1.52) | | 3.32 (1.53) | | 0.056 |
| LACE-A (Acuity Score), mean (SD) | | 2.84 (0.68) | 2.86 (0.63) | | 2.81 (0.73) | | 0.074 |
| LACE-C (Comorbidity Score), mean (SD) | | 3.08 (1.81) | 3.35 (1.75) | | 2.77 (1.82) | | 0.328 |
| LACE-E (ED Visits Score), mean (SD) | | 0.39 (0.89) | 0.40 (0.90) | | 0.39 (0.88) | | 0.012 |
| Length of stay, days, mean (SD) | | 4.99 (6.01) | 5.06 (5.92) | | 4.90 (6.10) | | 0.027 |
| Age, years, mean (SD) | | 62.75 (14.19) | 62.96 (14.04) | | 62.50 (14.34) | | 0.032 |
| Total procedures, mean (SD) | | 1.72 (1.96) | 1.61 (1.80) | | 1.85 (2.12) | | 0.120 |
| Congestive Heart Failure, % | | 68 | 73 | | 62 | | 0.235 |
| Renal Failure, % | | 45 | 50 | | 40 | | 0.197 |
| Cardiac Arrhythmias, % | | 37 | 41 | | 33 | | 0.161 |
| Chronic Pulmonary Disease, % | | 35 | 32 | | 38 | | 0.122 |
| Fluid and Electrolyte Disorders, % | | 32 | 34 | | 29 | | 0.112 |
| Diabetes, Uncomplicated, % | | 25 | 14 | | 37 | | 0.547 |
| Diabetes with Complications, % | | 25 | 38 | | 10 | | 0.670 |
| Hypertension, Uncomplicated, % | | 25 | 17 | | 34 | | 0.377 |
| Hypertension, Complicated, % | | 31 | 26 | | 36 | | 0.214 |
| Depression, % | | 8 | 8 | | 7 | | 0.033 |
| Obesity, % | | 28 | 30 | | 25 | | 0.108 |
| Deficiency Anemia, % | | 6 | 7 | | 6 | | 0.039 |
| Coagulopathy, % | | 5 | 6 | | 5 | | 0.062 |
| Hypothyroidism, % | | 8 | 8 | | 8 | | 0.002 |
| Liver Disease, % | | 4 | 5 | | 4 | | 0.043 |
| Peripheral Vascular Disease, % | | 11 | 13 | | 9 | | 0.128 |
| Valvular Disease, % | | 18 | 17 | | 19 | | 0.034 |
| Pulmonary Circulation Disorders, % | | 19 | 20 | | 17 | | 0.070 |
| Admission order, mean (SD) | | 1.49 (1.59) | 1.50 (1.63) | | 1.48 (1.54) | | 0.016 |
| Total CVD conditions, mean (SD) | | 4.57 (1.94) | 4.48 (1.83) | | 4.68 (2.05) | | 0.105 |
| Insurance Type, n (%): Commercial | | 33,341 (21.1) | 17,358 (20.7) | | 15,983 (21.6) | | 0.161 |
| Medicaid | | 16,868 (10.7) | 9,618 (11.5) | | 7,250 (9.8) | |  |
| Medicare | | 92,250 (58.5) | 50,522 (60.2) | | 41,728 (56.5) | |  |
| Self-Pay/Uninsured | | 15,332 (9.7) | 6,397 (7.6) | | 8,935 (12.1) | |  |
| Primary CVD Category, n (%): AMI | | 30,126 (19.1) | 15,259 (18.2) | | 14,867 (20.1) | | 0.096 |
| AF/AFL | | 18,782 (11.9) | 9,176 (10.9) | | 9,606 (13.0) | |  |
| HF | | 94,562 (59.9) | 51,227 (61.1) | | 43,335 (58.6) | |  |
| HHD | | 14,321 (9.1) | 8,233 (9.8) | | 6,088 (8.2) | |  |
| Race/Ethnicity, n (%): Black | | 152,492 (96.6) | 81,479 (97.1) | | 71,013 (96.1) | | 0.056 |
| Hispanic | | 5,299 (3.4) | 2,416 (2.9) | | 2,883 (3.9) | |  |
| LACE Risk Category, n (%): High | | 84,036 (53.3) | 49,048 (58.5) | | 34,988 (47.3) | | 0.231 |
| Low | | 6,188 (3.9) | 2,500 (3.0) | | 3,688 (5.0) | |  |
| Moderate | | 67,567 (42.8) | 32,347 (38.6) | | 35,220 (47.7) | |  |

Values are mean (SD) for continuous variables and n (%) for categorical variables. SMD = standardized mean difference; SMD > 0.10 indicates meaningful imbalance between coding eras. The ICD-10-CM coding system, implemented October 1, 2015, permits substantially more granular diagnostic coding, which may inflate comorbidity counts. N(ICD-9) = 73,896 (46.8%); N(ICD-10) = 83,895 (53.2%). Abbreviations: CVD, cardiovascular disease; HF, heart failure; AMI, acute myocardial infarction; AF/AFL, atrial fibrillation/atrial flutter; HHD, hypertensive heart disease; ICD, International Classification of Diseases; LACE, Length of stay, Acuity, Comorbidities, Emergency department visits; SD, standard deviation; SMD, standardized mean difference.

**Supplementary Table S11. Sensitivity Analysis of LACE Index Construct Overlap on Model Discrimination.**

| **CVD Category** | **Configuration** | **Feature Config** | **N Features** | **AUC (95% CI)** | **DeLong p vs Full** | **DeLong p vs Composite** | **DeLong p vs Components** |
| --- | --- | --- | --- | --- | --- | --- | --- |
| AMI | Unbalanced | LACE Components Only (Composite Removed) | 46 | 0.707 (0.690-0.724) | 0.664 | 0.6493 | — |
| AMI | Unbalanced | LACE Composite Index Only (Components Removed) | 44 | 0.707 (0.690-0.723) | 0.9003 | — | 0.6493 |
| AMI | Unbalanced | Full Feature Set (LACE Index + Components) | 47 | 0.707 (0.690-0.723) | — | 0.9003 | 0.664 |
| AF/AFL | Balanced | LACE Components Only (Composite Removed) | 46 | 0.726 (0.708-0.744) | 0.7822 | 0.8308 | — |
| AF/AFL | Balanced | LACE Composite Index Only (Components Removed) | 44 | 0.727 (0.708-0.744) | 0.5209 | — | 0.8308 |
| AF/AFL | Balanced | Full Feature Set (LACE Index + Components) | 47 | 0.726 (0.707-0.743) | — | 0.5209 | 0.7822 |
| HF | Balanced | LACE Components Only (Composite Removed) | 46 | 0.706 (0.699-0.714) | 0.6441 | 0.2122 | — |
| HF | Balanced | LACE Composite Index Only (Components Removed) | 44 | 0.706 (0.698-0.713) | 0.2953 | — | 0.2122 |
| HF | Balanced | Full Feature Set (LACE Index + Components) | 47 | 0.706 (0.699-0.713) | — | 0.2953 | 0.6441 |
| HHD | Balanced | LACE Components Only (Composite Removed) | 46 | 0.747 (0.725-0.770) | 0.9268 | 0.0149 | — |
| HHD | Balanced | LACE Composite Index Only (Components Removed) | 44 | 0.755 (0.731-0.776) | 0.0534 | — | 0.0149 |
| HHD | Balanced | Full Feature Set (LACE Index + Components) | 47 | 0.747 (0.725-0.768) | — | 0.0534 | 0.9268 |

XGBoost models were trained using the same hyperparameters and patient-grouped train/test splits as the primary analysis. ‘Full’ includes both the LACE Index composite and its constituent components (L, A, C, E); ‘Composite Only’ includes the LACE Index but removes the individual components; ‘Components Only’ includes L, A, C, E but removes the composite LACE Index. DeLong tests compare AUC differences between configurations. Abbreviations: AUC, area under the receiver operating characteristic curve; CI, confidence interval; CVD, cardiovascular disease; HF, heart failure; AMI, acute myocardial infarction; AF/AFL, atrial fibrillation/atrial flutter; HHD, hypertensive heart disease; LACE, Length of stay, Acuity, Comorbidities, Emergency department visits. The full feature set includes 47 features (45 consensus features plus LACE-L and LACE-E scores not in the primary consensus set), compared with 45 features in the primary analysis. This minor difference accounts for small AUC variations relative to Table 2 (e.g., AMI 0.707 vs. 0.706).

**Supplementary Figure S1.** Four-Method Consensus Feature Selection Heatmap


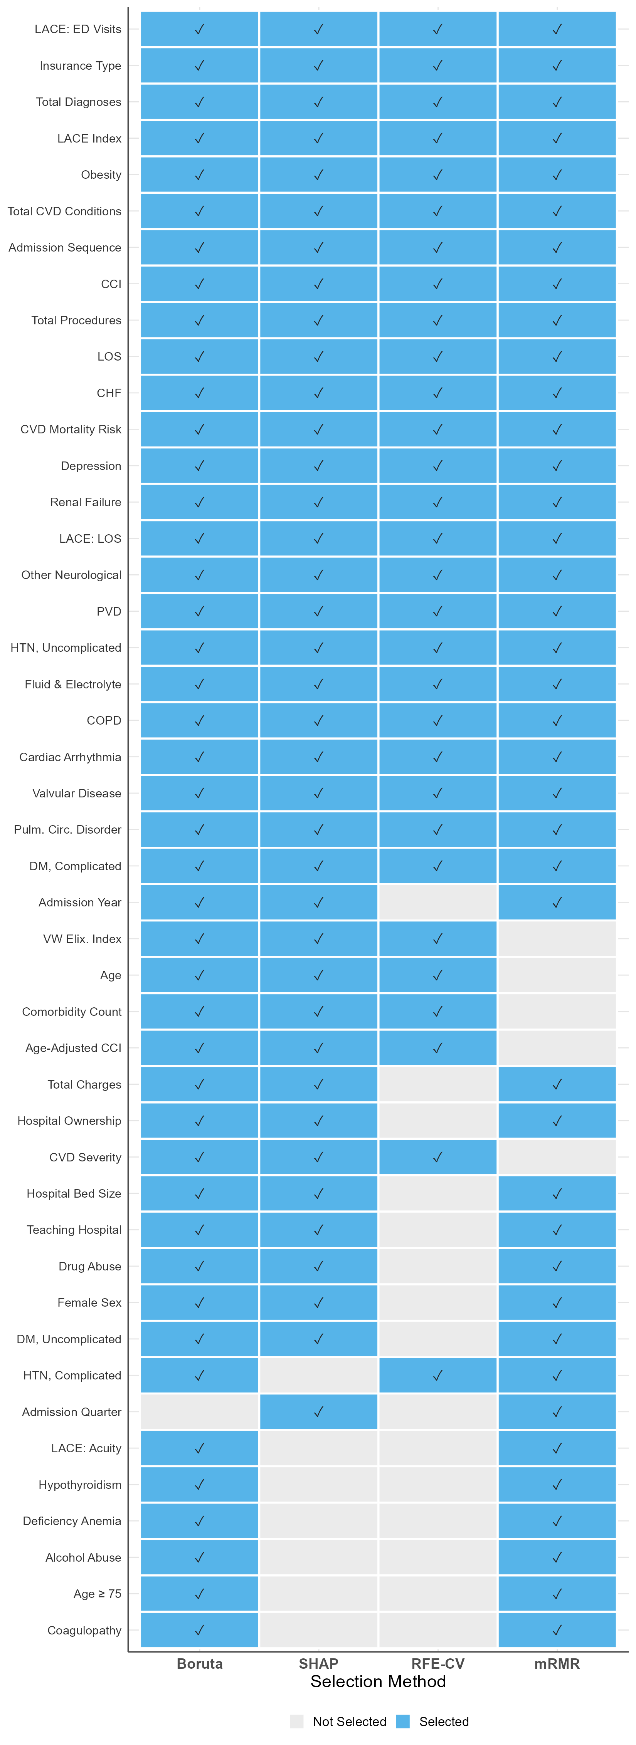


Binary heatmap depicting endorsement of each candidate feature by four independent selection methods: Boruta all-relevant selection, SHAP-based importance from a reference XGBoost model, recursive feature elimination with patient-grouped cross-validation (RFE-CV), and minimum redundancy maximum relevance (mRMR). Features endorsed by at least 2 of 4 methods were retained, yielding 45 consensus-selected features applied uniformly across all CVD categories and dataset configurations. Abbreviations: CVD, cardiovascular disease; mRMR, minimum redundancy maximum relevance; RFE-CV, recursive feature elimination with cross-validation; SHAP, SHapley Additive exPlanations.

**Supplementary Figure S2.** Super Learner Ensemble Meta-Learner Weights by CVD Category


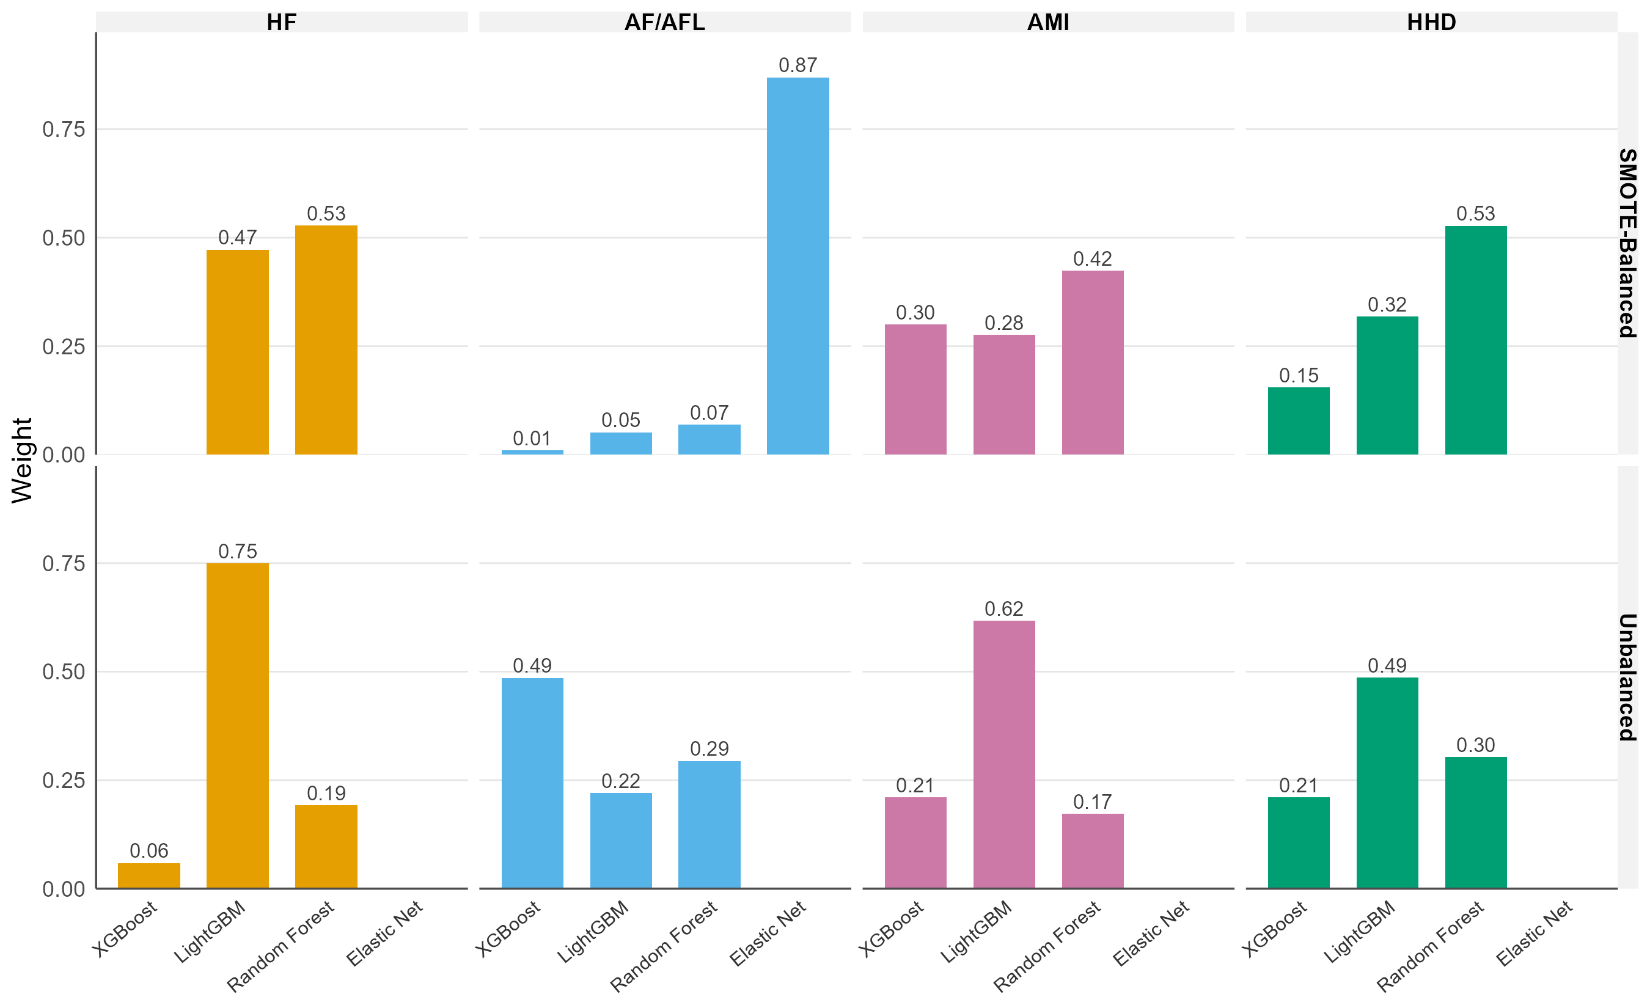


Bar charts showing the optimized convex combination weights assigned to each base learner (XGBoost, LightGBM, Random Forest, Elastic Net) within the Super Learner stacked ensemble, stratified by CVD category and dataset configuration (SMOTE-balanced vs. unbalanced). Weights reflect each algorithm’s relative contribution to the ensemble’s final predictions, with larger weights indicating greater influence on the combined model output. Abbreviations: AF/AFL, atrial fibrillation/flutter; AMI, acute myocardial infarction; CVD, cardiovascular disease; HF, heart failure; HHD, hypertensive heart disease; SMOTE, Synthetic Minority Oversampling Technique.

**Supplementary Figure S3.** SHAP Dependence Plots for Top Predictors by CVD Category
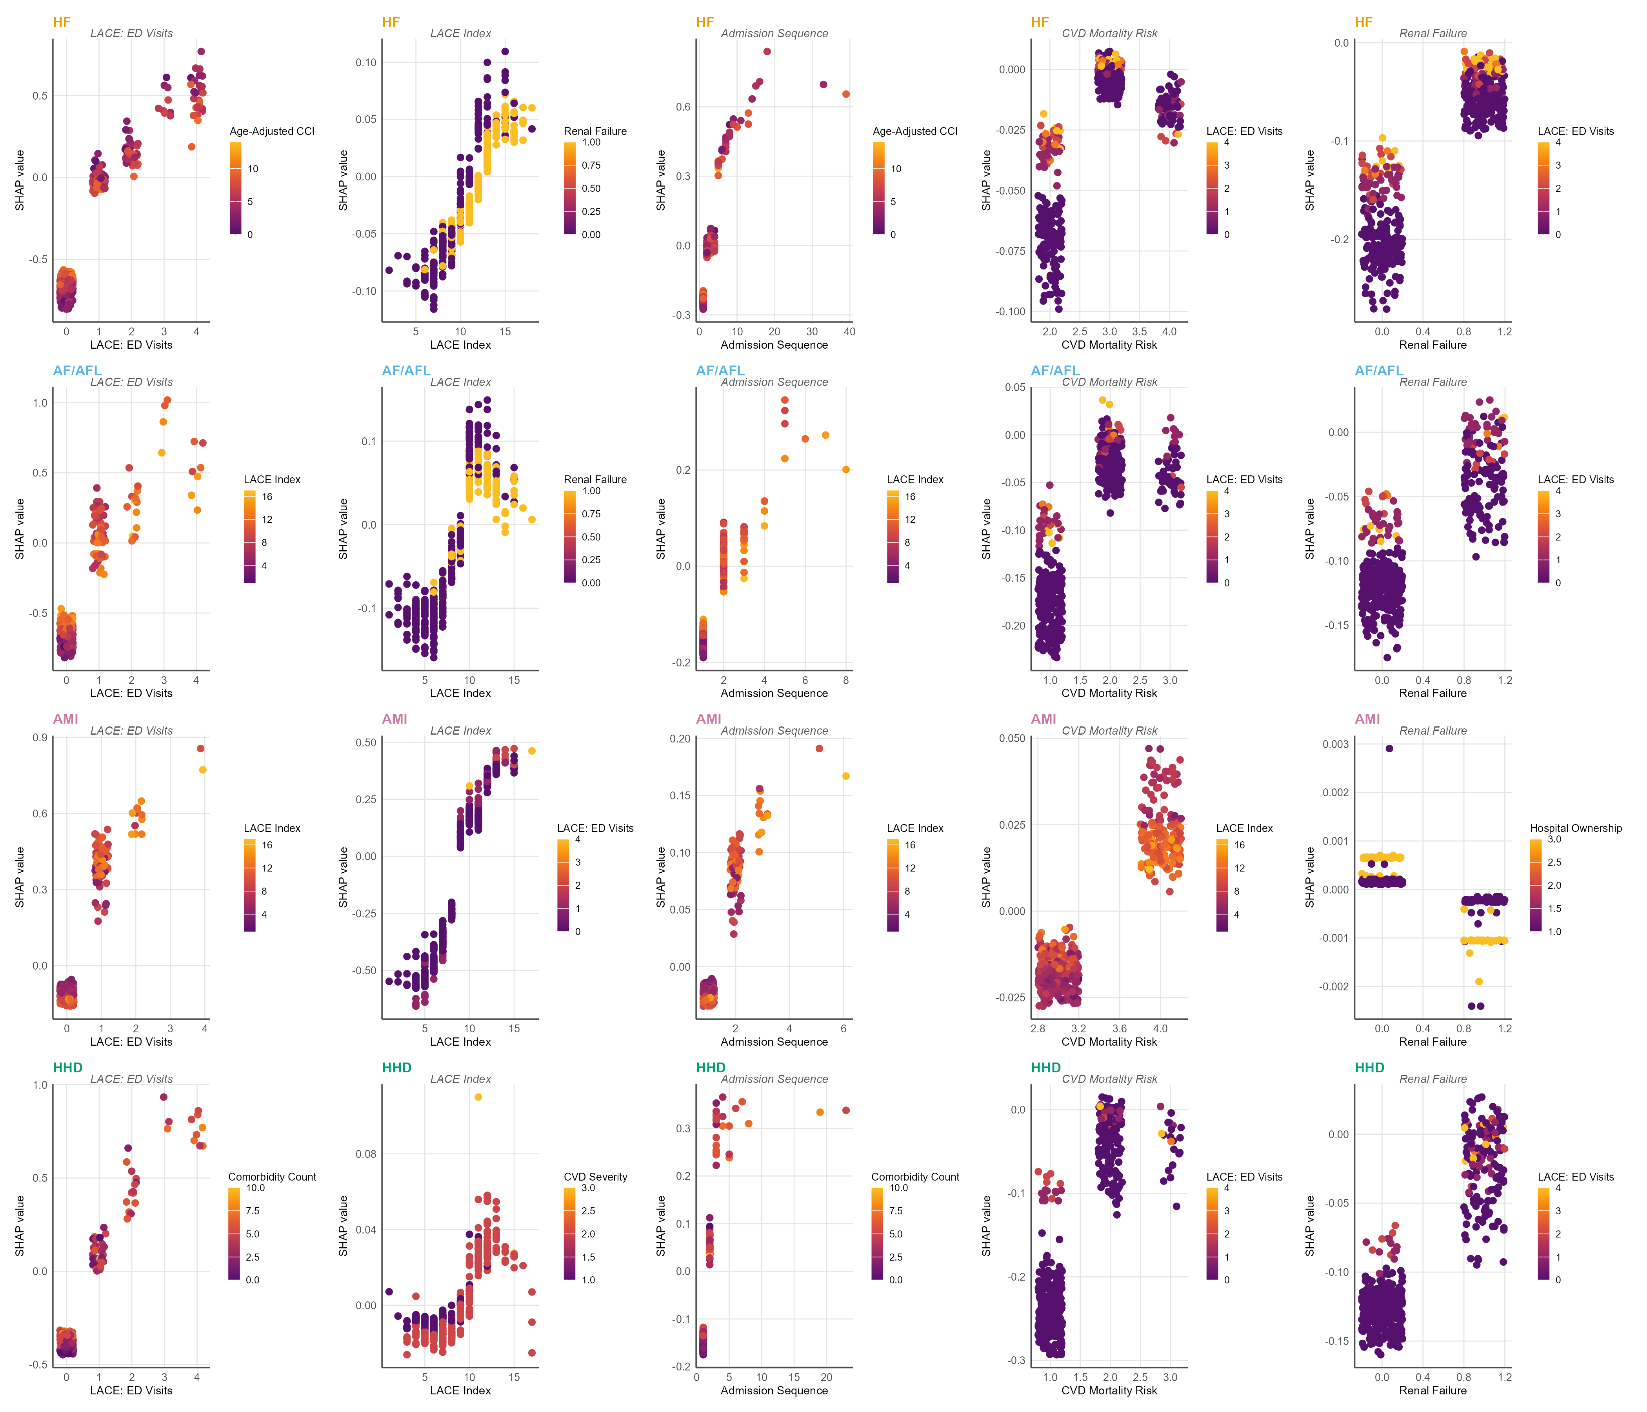


SHAP dependence plots for the top continuous predictors from each CVD category’s best-performing model, illustrating non-linear relationships between feature values (x-axis) and their SHAP contributions to the predicted log-odds of 30-day readmission (y-axis). Color indicates interaction effects with the most correlated feature. These plots reveal threshold effects (e.g., LACE Index), diminishing marginal returns, and differential effects of insurance type across predicted risk levels. SHAP values were computed on a random subsample of 500 test observations per condition (set.seed(42)).

Abbreviations: AF/AFL, atrial fibrillation/flutter; AMI, acute myocardial infarction; CVD, cardiovascular disease; HF, heart failure; HHD, hypertensive heart disease; LACE, Length of stay/Acuity/Comorbidity/Emergency visits; SHAP, SHapley Additive exPlanations.

**Supplementary Figure S4.** SHAP Waterfall Plots : Individual Prediction Explanations
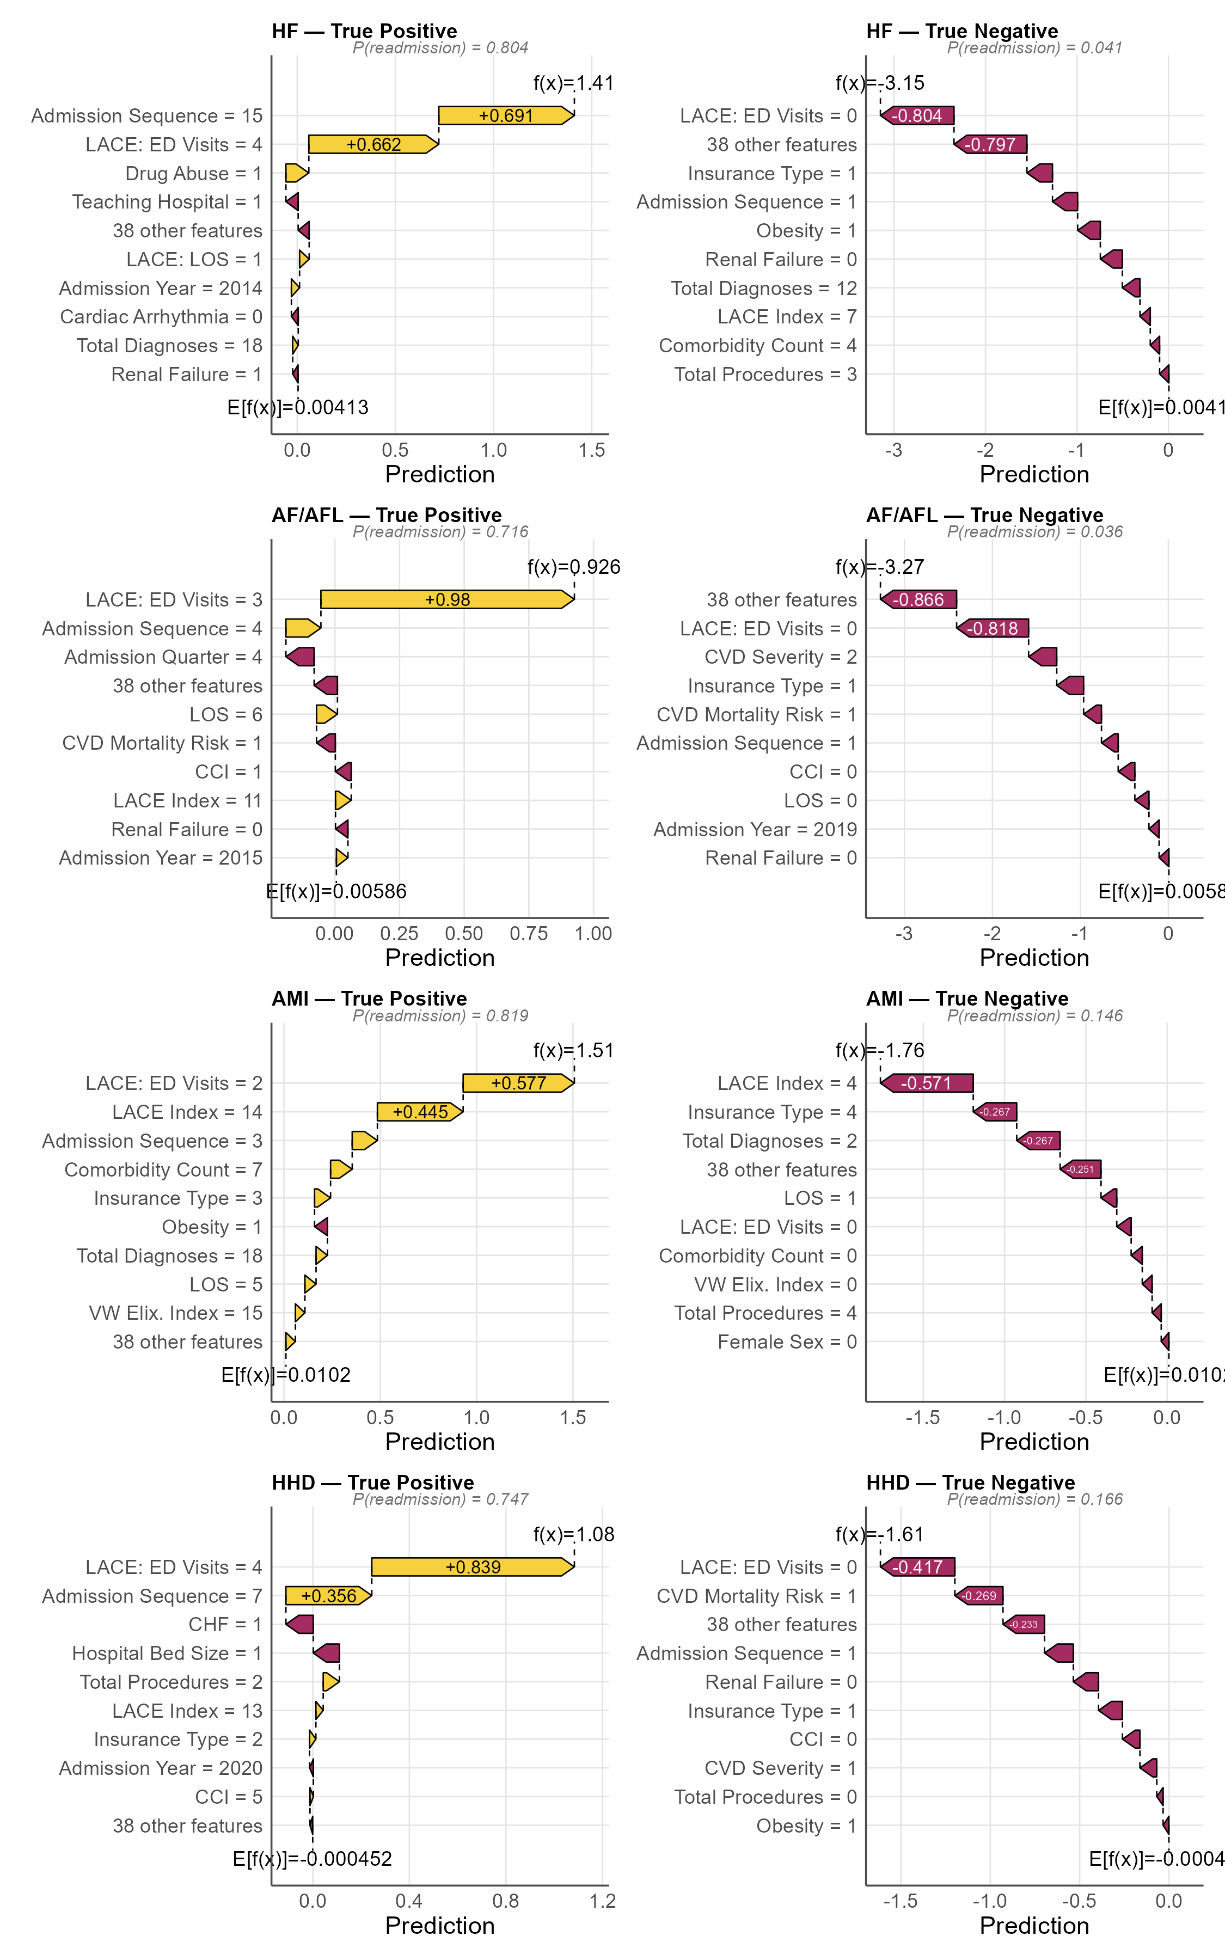


SHAP waterfall plots for representative true positive and true negative cases from each CVD category’s best-performing model. Each panel decomposes a single patient’s predicted probability of 30-day readmission into additive feature contributions, starting from the base rate (E[f(x)]) and showing how each feature pushes the prediction higher (red) or lower (blue). True positive cases are selected as the highest-confidence correct readmission predictions; true negative cases as the lowest-probability correct non-readmission predictions. Feature values for the selected patient are displayed alongside each bar.

Abbreviations: AF/AFL, atrial fibrillation/flutter; AMI, acute myocardial infarction; CVD, cardiovascular disease; E[f(x)], expected model output (base rate); HF, heart failure; HHD, hypertensive heart disease; SHAP, SHapley Additive exPlanations; TN, true negative; TP, true positive.
Note: Because the 30-day readmission rate exceeds 10% in all CVD categories (18.9% overall, 22.5% for Heart Failure, 15.3% for AF/AFL, 13.0% for AMI, 12.4% for HHD), odds ratios from logistic regression do not approximate relative risks at these prevalence levels. ORs presented here should be interpreted as measures of association on the odds scale, not as indicating “X% higher risk” of readmission.
